# Supplementary material for: Solute dispersion in pre-turbulent confined active nematics
Source: Royal Society of Chemistry journal article supplement (doi:10.1039/d4sm01175a), 2025-01-01
Supplement: d4sm01175a1.pdf [file d4sm01175a1.pdf]

## Supplementary Material: Solute Dispersion in Pre-Turbulent Confined Active Nematics

### DESCRIPTIONS OF SUPPLEMENTARY VIDEOS

**Supplementary Video 1:** Time evolution of the director field in the *oscillatory regime*, with the same color code as figure 1 of the main text. The activity is  $\zeta = 0.0085$ . The video spans 50,000 simulation units.

**Supplementary Video 2:** Time evolution of the director field in the *dancing regime*, with the same color code as figure 1 of the main text. The activity is  $\zeta = 0.0013$ . The video spans 300,000 simulation units.

**Supplementary Video 3:** Time evolution of the flow field in the *oscillatory regime*, with the same color code as figure 1 of the main text. The activity is  $\zeta = 0.0013$ . The video spans 300,000 simulation units.

**Supplementary Video 4:** Time evolution of the flow field in the *dancing regime*. The activity is  $\zeta = 0.013$ . The video spans 300,000 simulation units.

**Supplementary Video 5:** Time evolution of the vorticity field in the *dancing regime*. The oscillations of the vorticity are more prominent. The activity is  $\zeta = 0.013$ . The video spans 300,000 simulation units.

**Supplementary Video 6:** Solute dispersion in the *oscillatory regime*. The activity is  $\zeta = 0.0085$ . The video spans about 200,000 simulation units.

**Supplementary Video 7:** Solute dispersion in the *dancing regime*. The activity is  $\zeta = 0.013$ . The video spans about 200,000 simulation units.

**Supplementary Video 8:** Tracer motion in the *oscillatory regime*. The activity is  $\zeta = 0.0085$ . The video spans about 70,000 simulation units.

**Supplementary Video 9:** Tracer motion in the *dancing regime*. The activity is  $\zeta = 0.013$ . The video spans about 200,000 simulation units.
